# Supplementary material for: GWAS of Reproductive Traits in Large White Pigs on Chip and Imputed Whole-Genome Sequencing Data
Source: MDPI journal article supplement (doi:10.3390/ijms232113338), 2022-11-01

**Figure S1 TNB trait of the Canadian line**

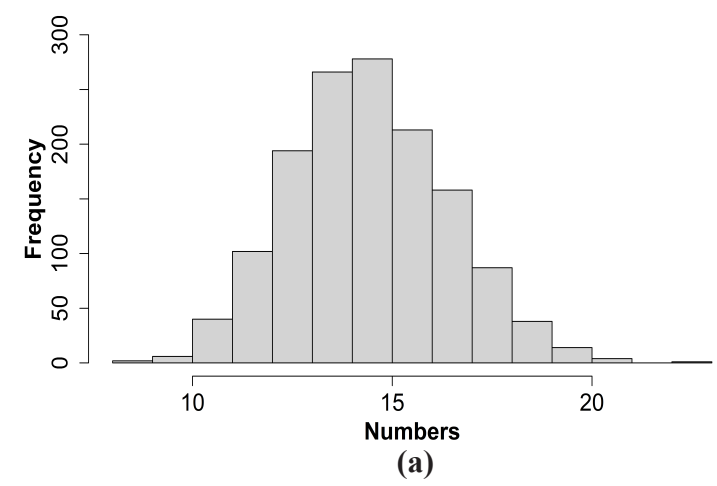

**TNB trait of the French line**

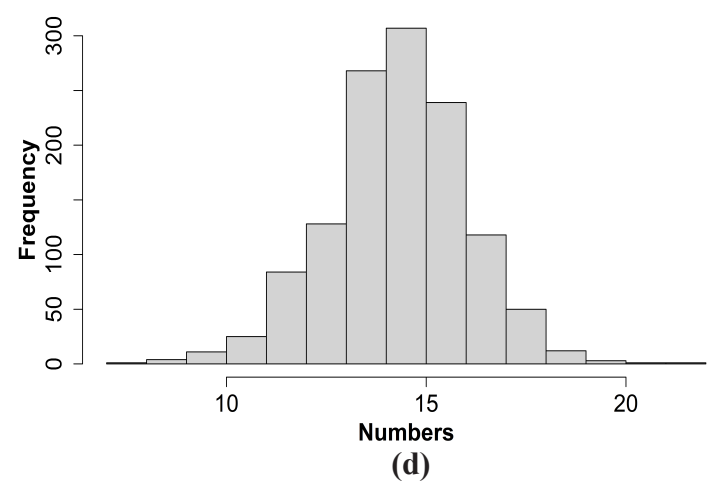

**NSB trait of the Canadian line**

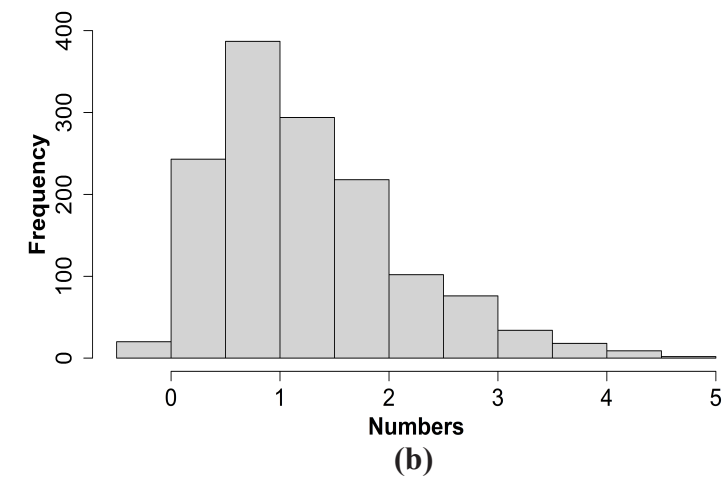

**NSB trait of the French line**

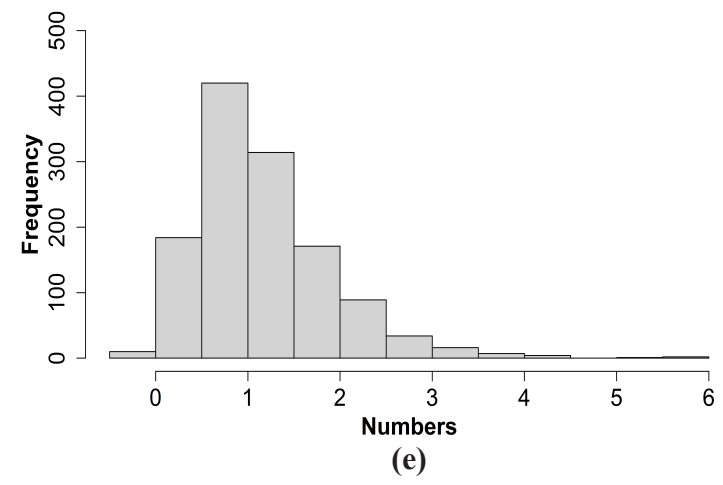

**GL trait of the Canadian line**

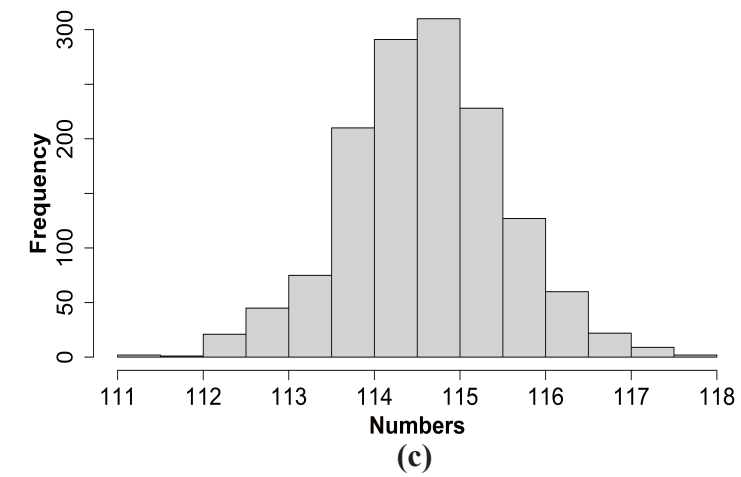

**GL trait of the French line**

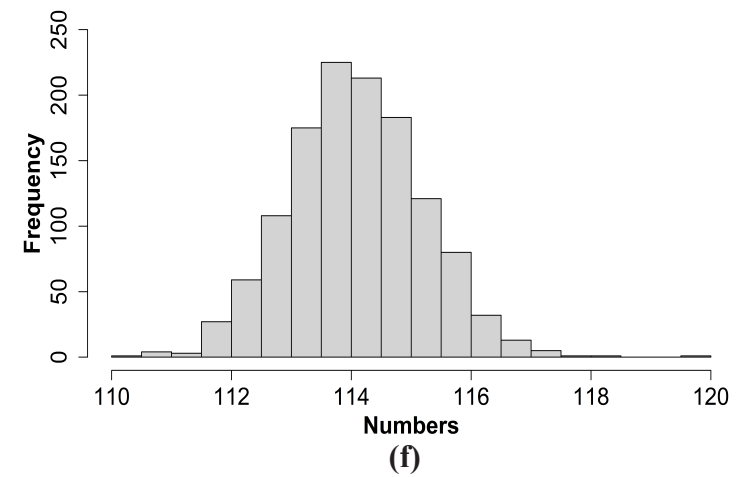

**Figure S2**

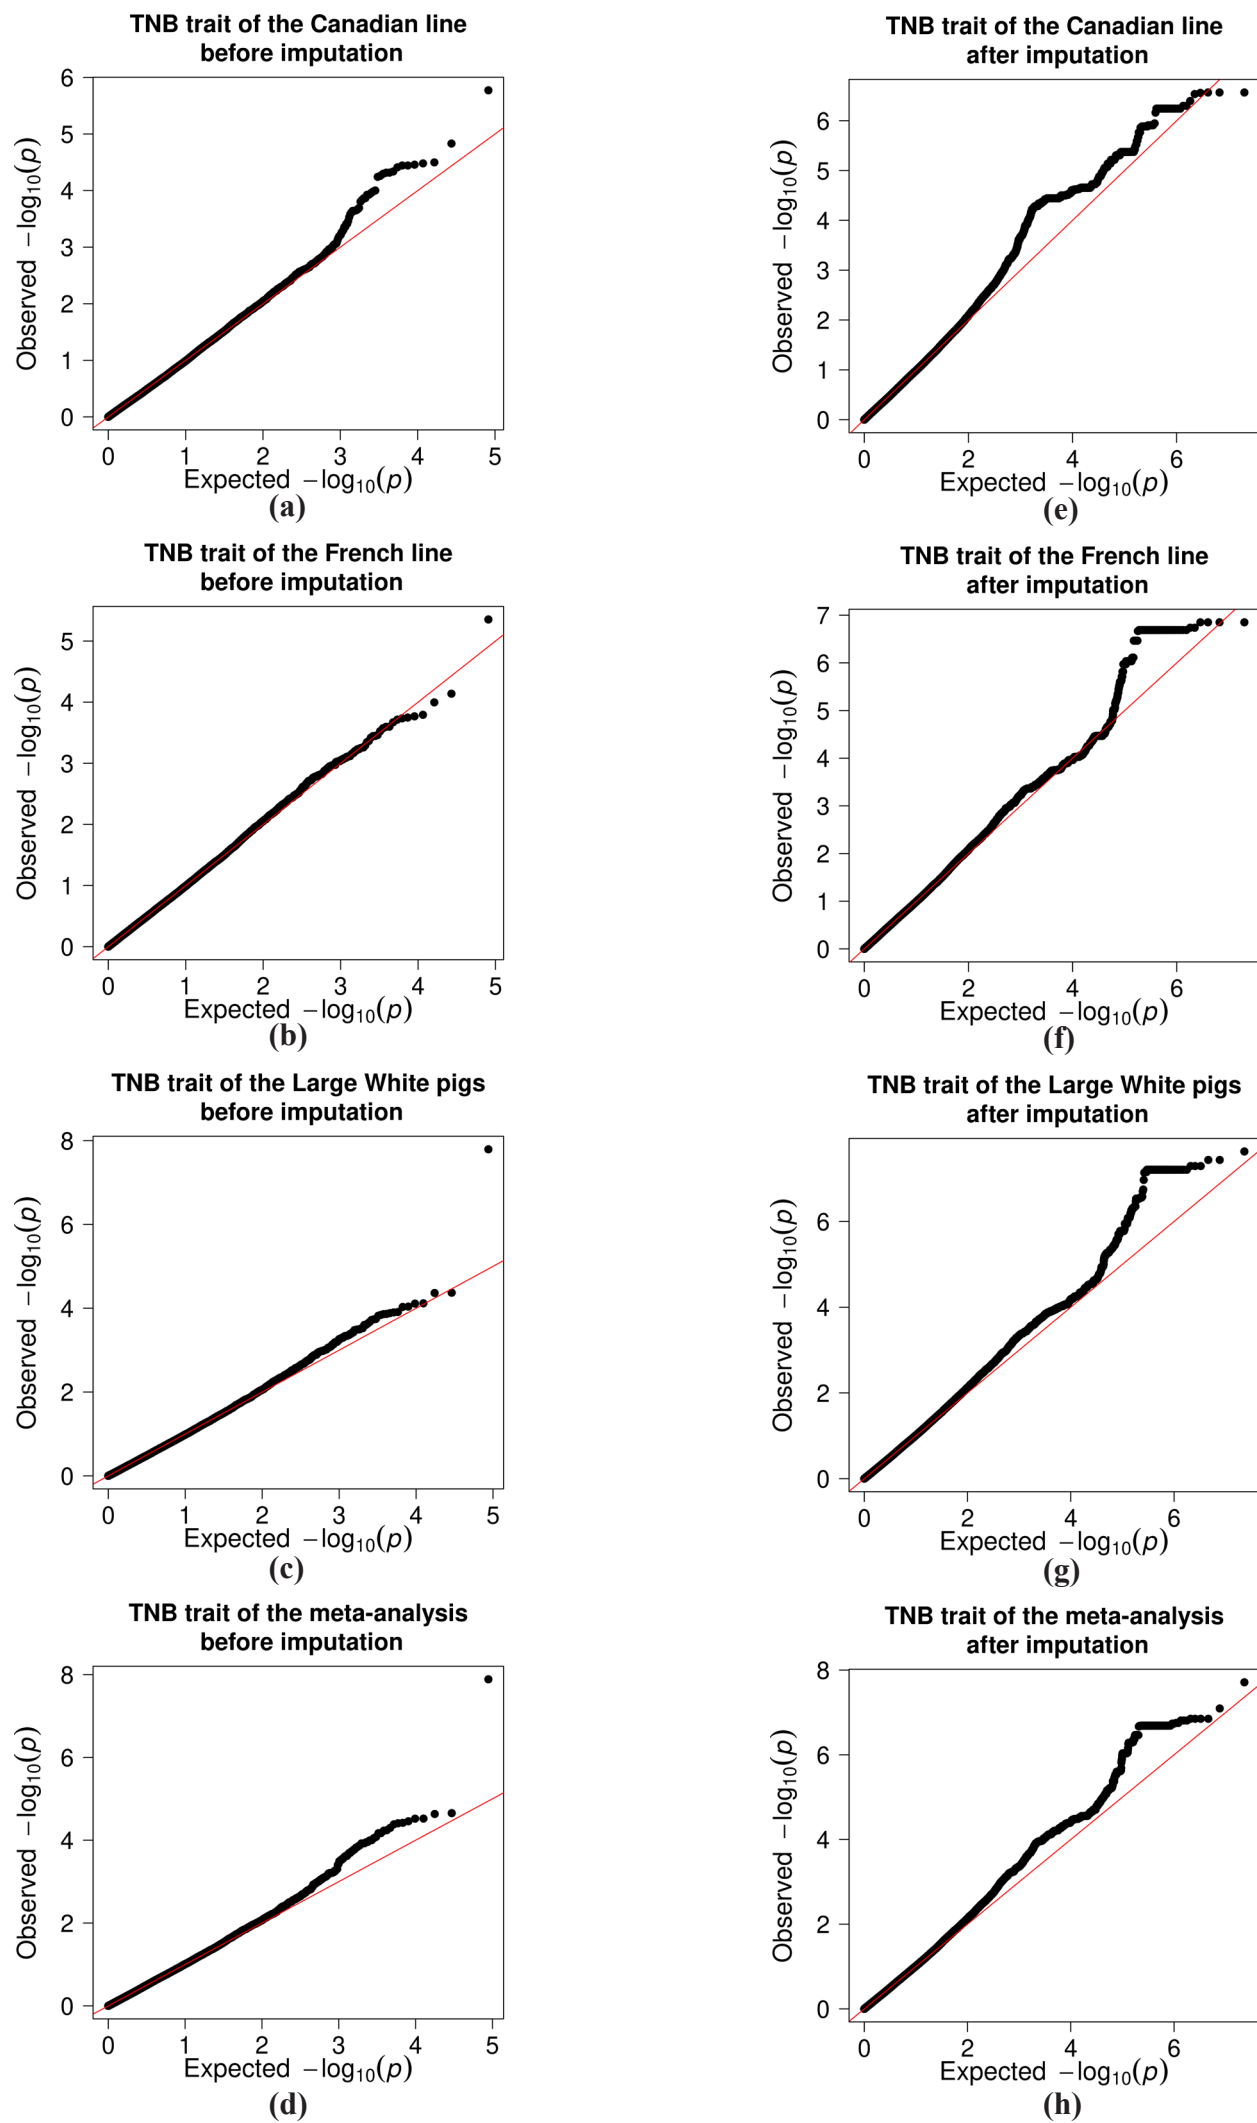

**Figure S3**

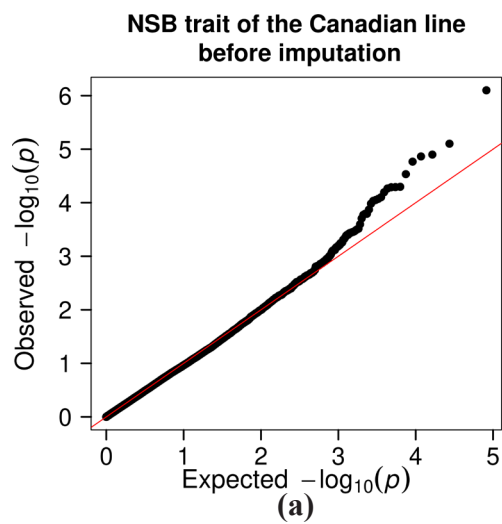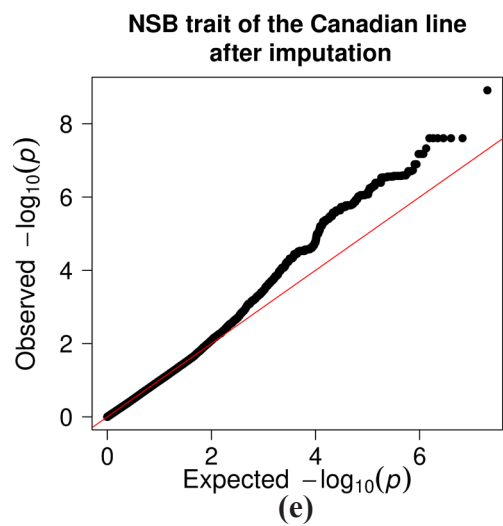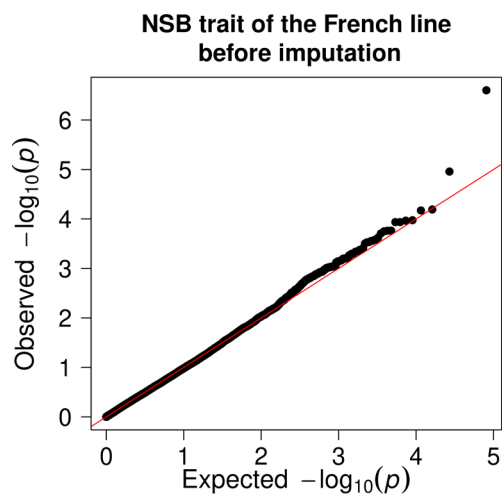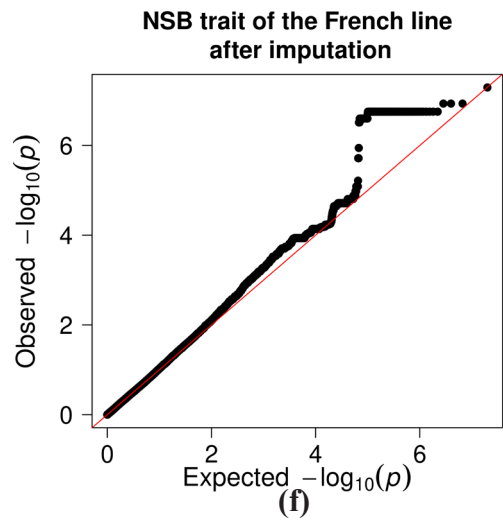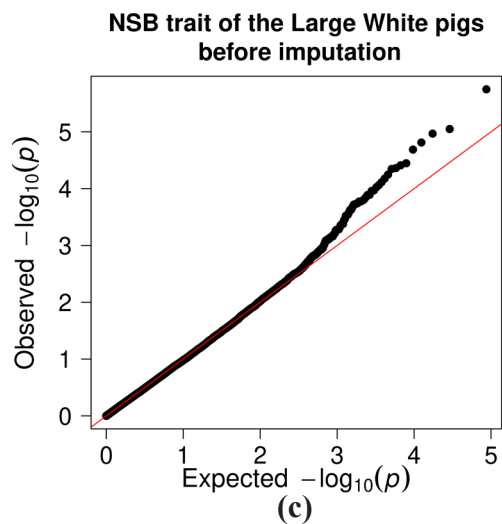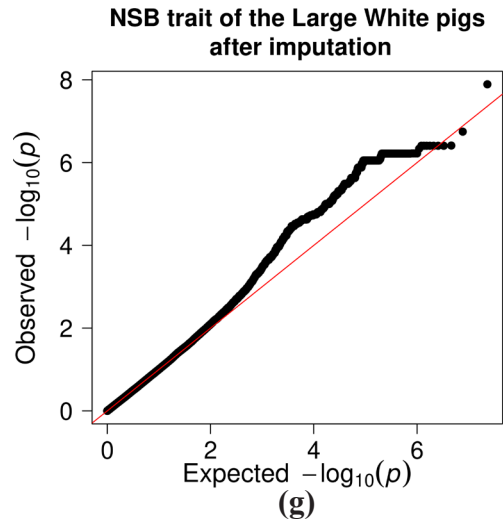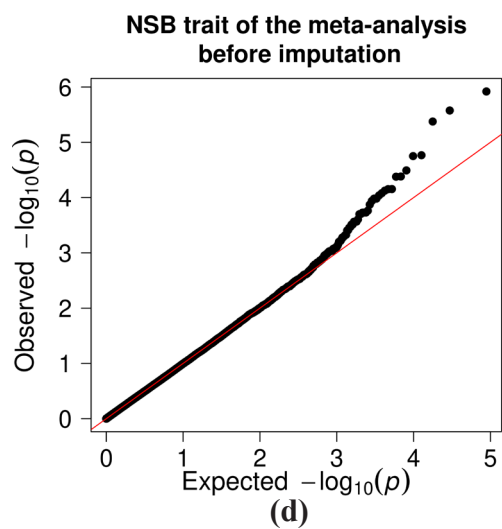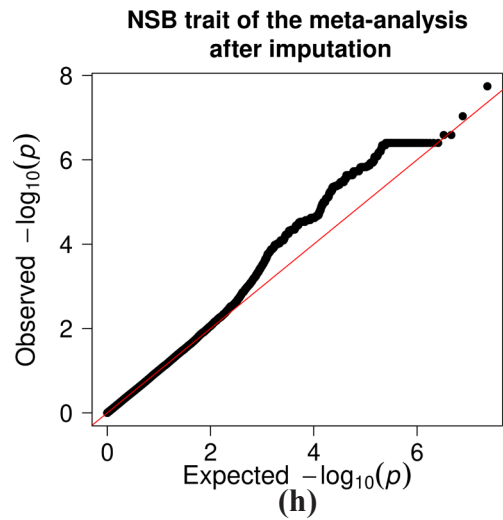

**Figure S4**

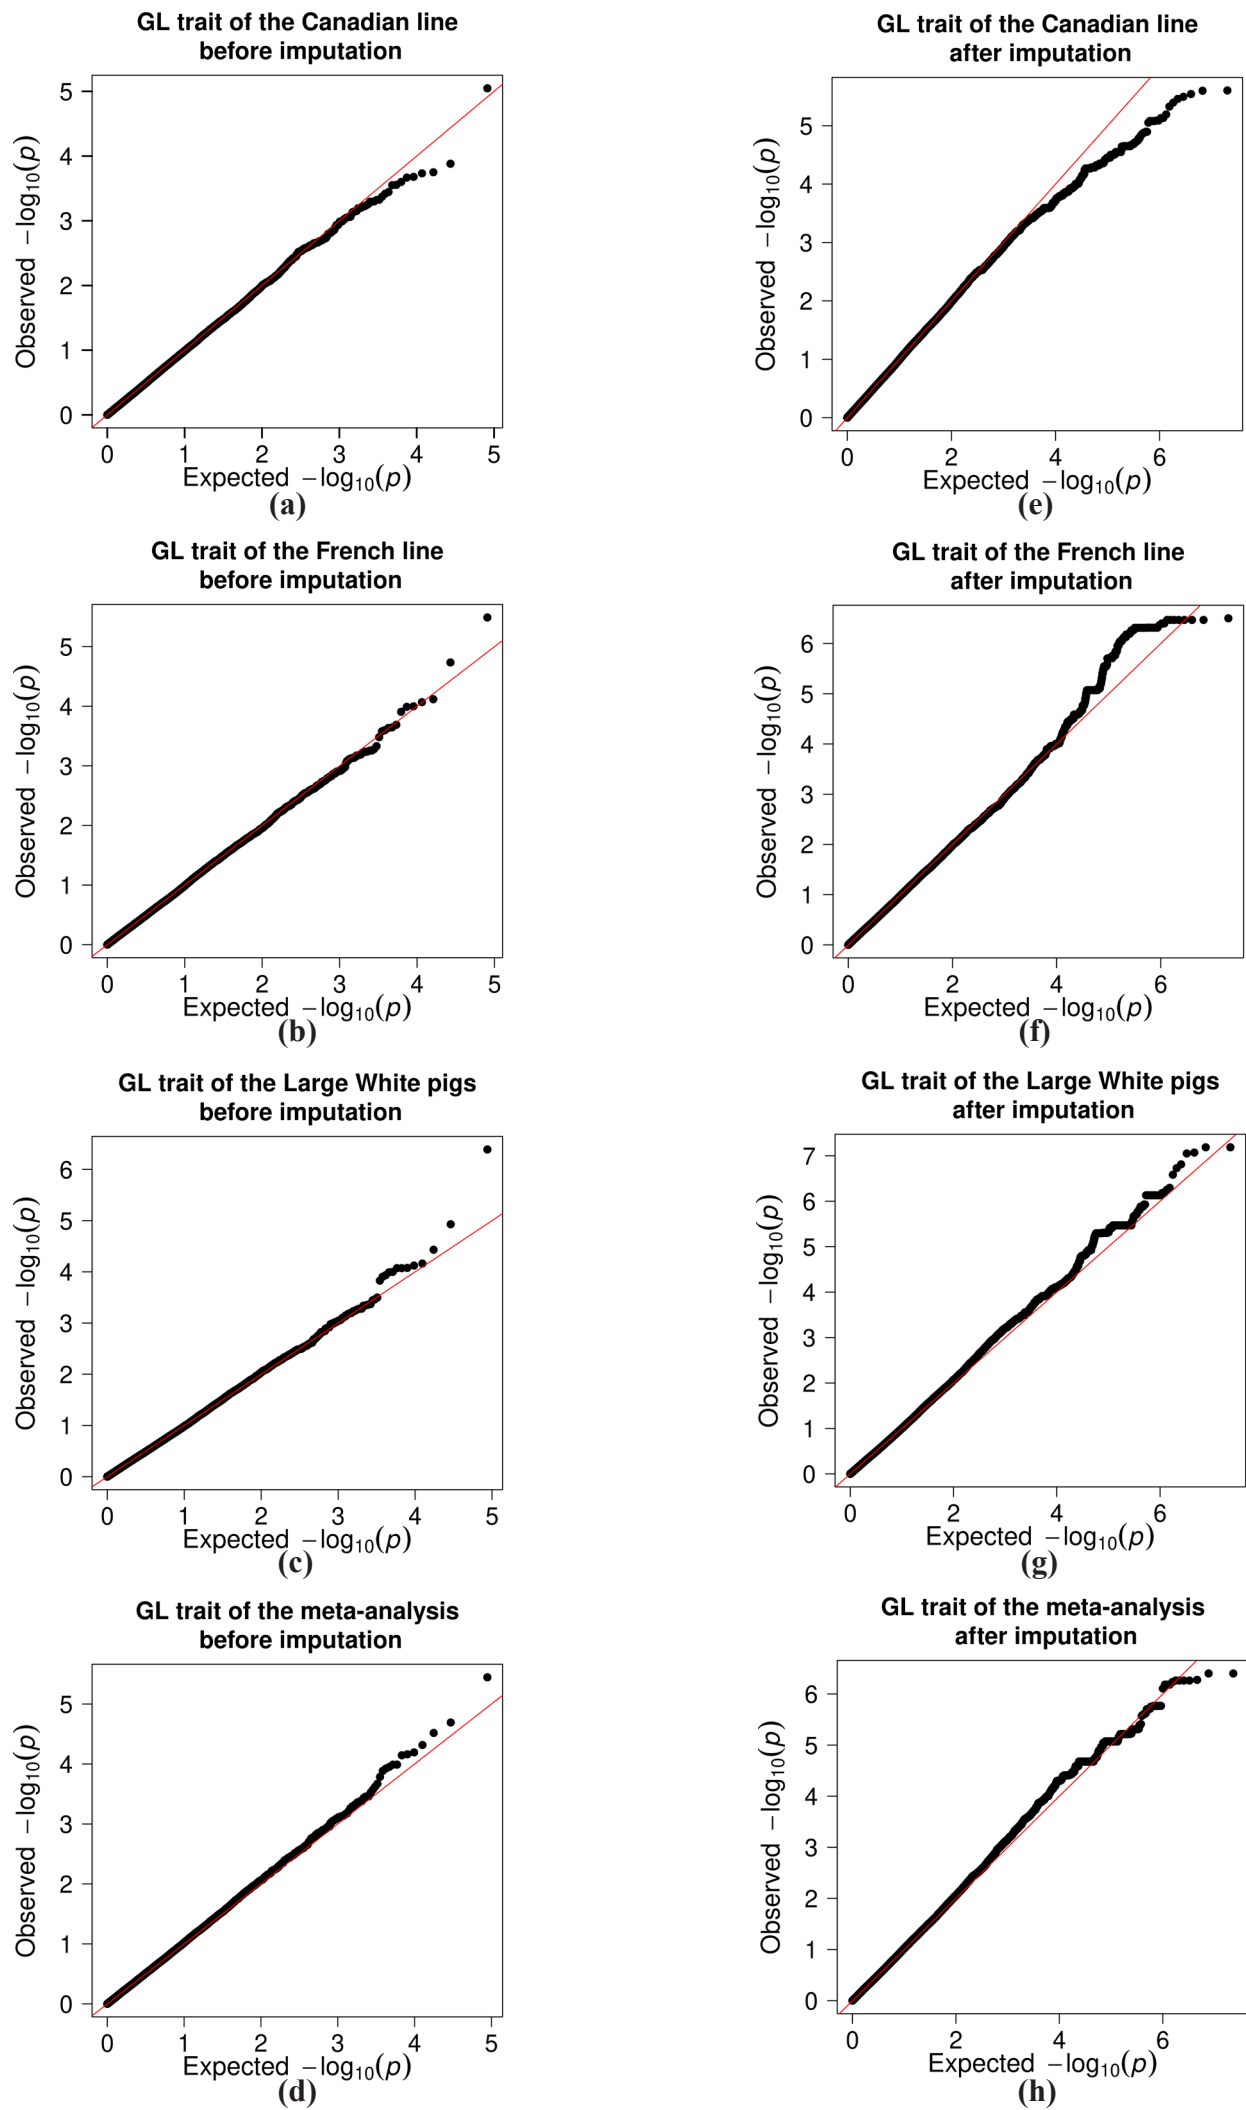

Supplement: s1 [file s1]
