# Supplementary material for: GWAS of Reproductive Traits in Large White Pigs on Chip and Imputed Whole-Genome Sequencing Data
Source: MDPI journal article supplement (doi:10.3390/ijms232113338), 2022-11-01
Supplement: s1 [file s1]

**Supplementary Table S1.** The number of SNPs before and after imputation, and the number of SNPs used for GWAS in the imputation-based WGS data after imputation quality control in each chromosome. The imputation accuracy  $R^2$  before and after quality control in each chromosome.

| Chr | Before imputation | After imputation       |       |                       |       |
|-----|-------------------|------------------------|-------|-----------------------|-------|
|     |                   | Before quality control |       | After quality control |       |
|     |                   | N_SNPs                 | $R^2$ | N_SNPs                | $R^2$ |
| 1   | 4,477             | 1,339,285              | 0.884 | 1,075,629             | 0.951 |
| 2   | 3,024             | 999,583                | 0.874 | 803,914               | 0.943 |
| 3   | 2,695             | 926,745                | 0.880 | 729,297               | 0.948 |
| 4   | 2,687             | 805,630                | 0.875 | 636,131               | 0.946 |
| 5   | 2,084             | 715,246                | 0.874 | 566,581               | 0.942 |
| 6   | 3,105             | 1,085,543              | 0.878 | 856,276               | 0.944 |
| 7   | 2,556             | 827,816                | 0.876 | 658,652               | 0.942 |
| 8   | 2,674             | 932,853                | 0.858 | 716,623               | 0.939 |
| 9   | 2,897             | 886,752                | 0.887 | 717,149               | 0.947 |
| 10  | 1,377             | 692,778                | 0.859 | 523,450               | 0.928 |
| 11  | 1,687             | 636,509                | 0.862 | 490,523               | 0.935 |
| 12  | 1,233             | 531,749                | 0.861 | 405,278               | 0.930 |
| 13  | 3,383             | 1,029,986              | 0.883 | 822,649               | 0.948 |
| 14  | 2,965             | 922,836                | 0.876 | 718,359               | 0.946 |
| 15  | 2,672             | 763,715                | 0.890 | 627,684               | 0.947 |
| 16  | 1,596             | 553,301                | 0.877 | 443,281               | 0.940 |
| 17  | 1,277             | 514,149                | 0.867 | 399,292               | 0.938 |
| 18  | 1,160             | 396,969                | 0.908 | 331,068               | 0.951 |

Chr, chromosome; N\_SNPs, number of SNPs;  $R^2$ , imputation accuracy.

**Supplementary Table S2.** The genomic inflation factor ( $\lambda$ ) for each GWAS using chip data in pigs.

| Trait                     | $\lambda$ (Canadian) | $\lambda$ (French) | $\lambda$ (Combined LW) | $\lambda$ (Meta) |
|---------------------------|----------------------|--------------------|-------------------------|------------------|
| Total number born (TNB)   | 0.960                | 1.000              | 0.950                   | 0.985            |
| Number of stillborn (NSB) | 0.957                | 1.006              | 0.968                   | 1.003            |
| Gestation length (GL)     | 0.973                | 0.978              | 0.989                   | 1.024            |

**Supplementary Table S3.** The genomic inflation factor ( $\lambda$ ) for each GWAS using imputed WGS data in pigs.

| Trait                     | $\lambda$ (Canadian) | $\lambda$ (French) | $\lambda$ (Combined LW) | $\lambda$ (Meta) |
|---------------------------|----------------------|--------------------|-------------------------|------------------|
| Total number born (TNB)   | 0.969                | 0.987              | 0.977                   | 0.993            |
| Number of stillborn (NSB) | 0.938                | 1.036              | 0.977                   | 1.013            |
| Gestation length (GL)     | 0.975                | 0.975              | 0.990                   | 1.024            |
